# Supplementary material for: Magnetic hollow carbon microspheres as a reusable adsorbent for rhodamine B removal
Source: Royal Society of Chemistry journal article supplement (doi:10.1039/c7ra03045b), 2017-01-01
Supplement: c7ra03045b1.pdf [file c7ra03045b1.pdf]

## Supporting Information

### **Magnetic Hollow Carbon Microspheres as reusable adsorbent for Rhodamine B removal**

Feifei Lu,<sup>b</sup> Ci Huang<sup>a</sup>, Lijun You, <sup>\*,a</sup>, Jiabing Wang,<sup>a</sup> Qiqing Zhang <sup>\*,a</sup>

<sup>a</sup>Institute of Biomedical and Pharmaceutical Technology, Fuzhou University,  
Fuzhou 350002, China

<sup>b</sup>Institute of Food Safety and Environment Monitoring, Fuzhou University,  
Fuzhou, 350108, China

\* Corresponding author: Lijun You; Qiqing Zhang

Phone: +86-591-83725260; fax: +86-591-83725260

E-mail address: yljyoyo@126.com (L. You); zhangqiq@126.com (Q. Zhang)

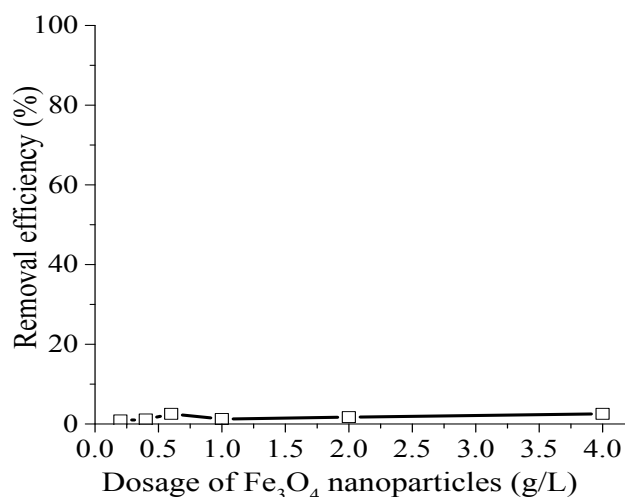

**Figure S1** The removal of RB by various amount of Fe<sub>3</sub>O<sub>4</sub> nanospheres (RB concentration 100 mg/L, temperature 25°C, pH=7 and adsorption time 120 min).

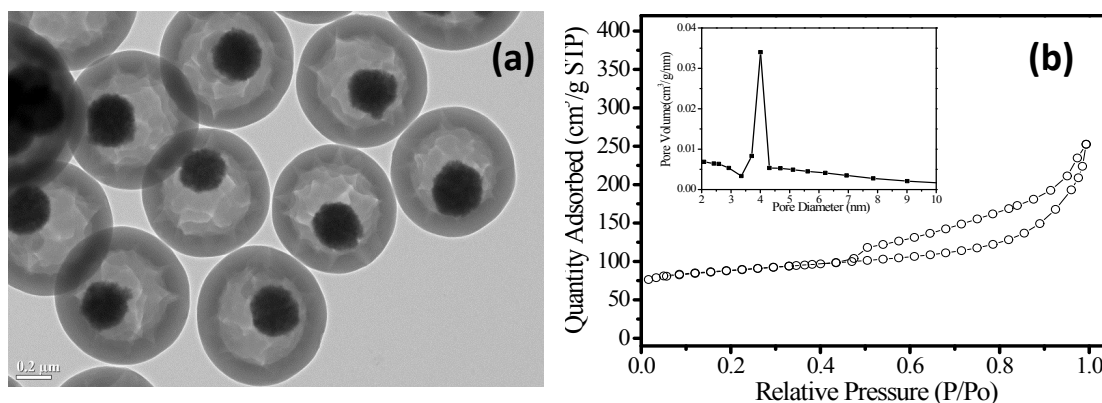

**Figure S2** (a) TEM image and (b) N<sub>2</sub> sorption isotherm of the single-carbon-layer mesoporous carbon microspheres (SLCM).

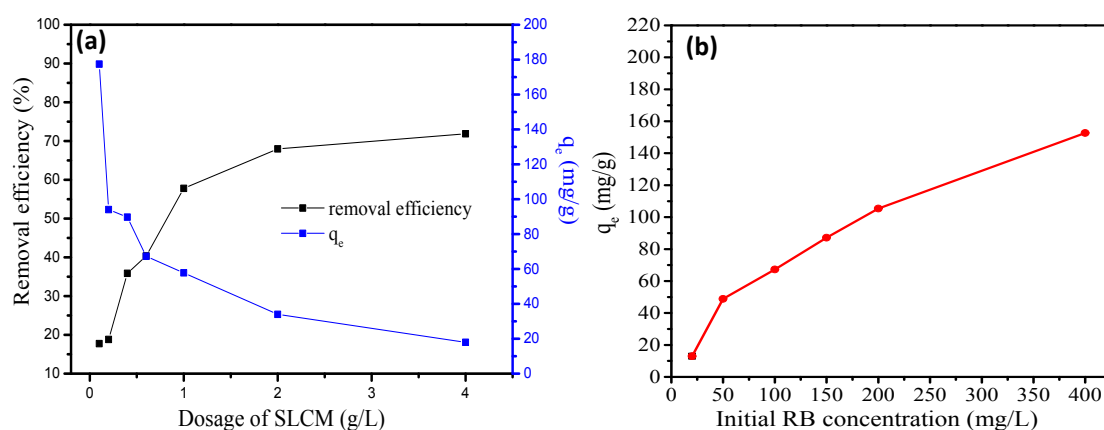

**Figure S3** (a) Effect of the dosage of SLCM on the removal efficiency (RB concentration 100 mg/L, temperature 25°C, pH=7 and adsorption time 120 min); (b) Effect of the initial RB concentration (temperature 25°C, adsorption time 120 min, dosages of SLCM 0.6 g/L, pH=7).

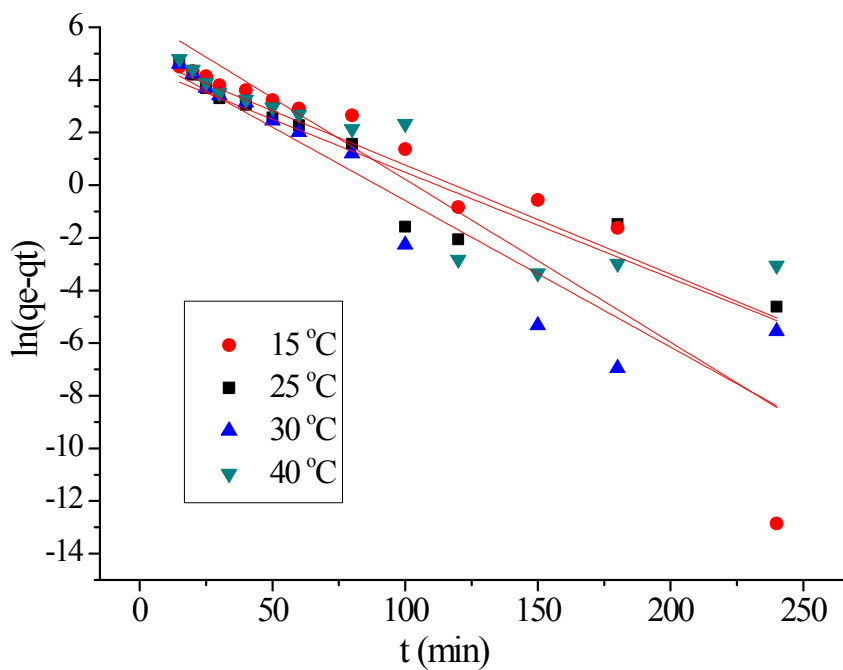

**Figure S4** Pseudo-first-order kinetic plots of RB removal by MHCM.

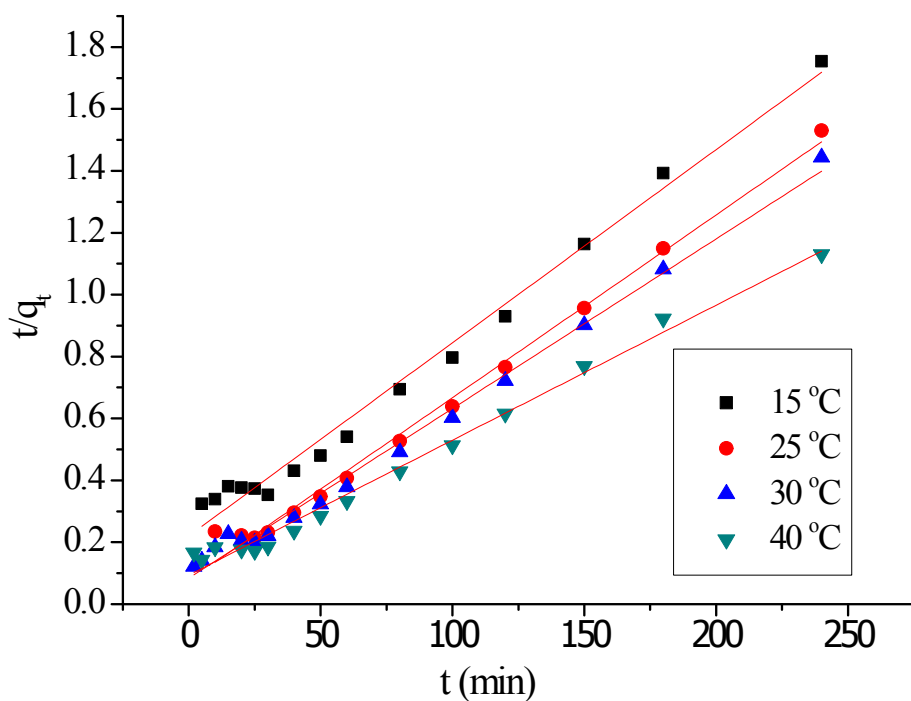

**Figure S5** Pseudo-second-order kinetic plots of RB removal by MHCM.

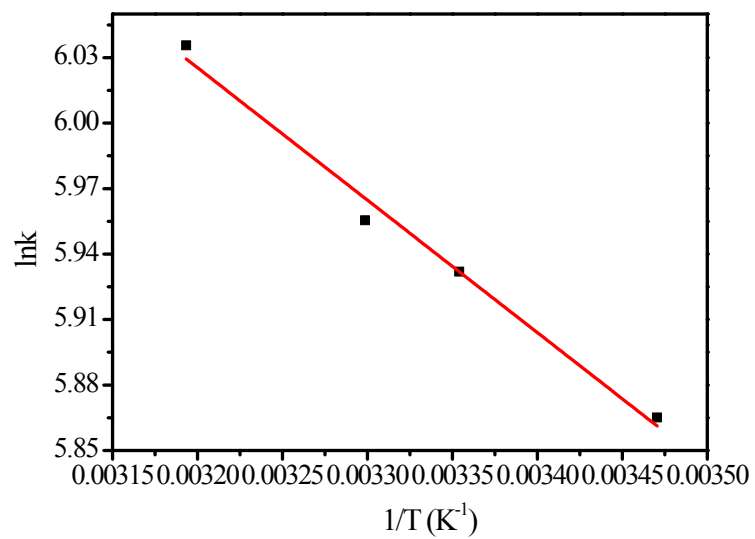

**Figure S6** The plot of  $\ln k$  vs.  $1/T$ .
